# Supplementary material
Source: Springer Nature journal article supplement (https://www.springermedizin.de/resource/supplementary/12889_2012_5594_MOESM3_ESM.pdf/9495740)

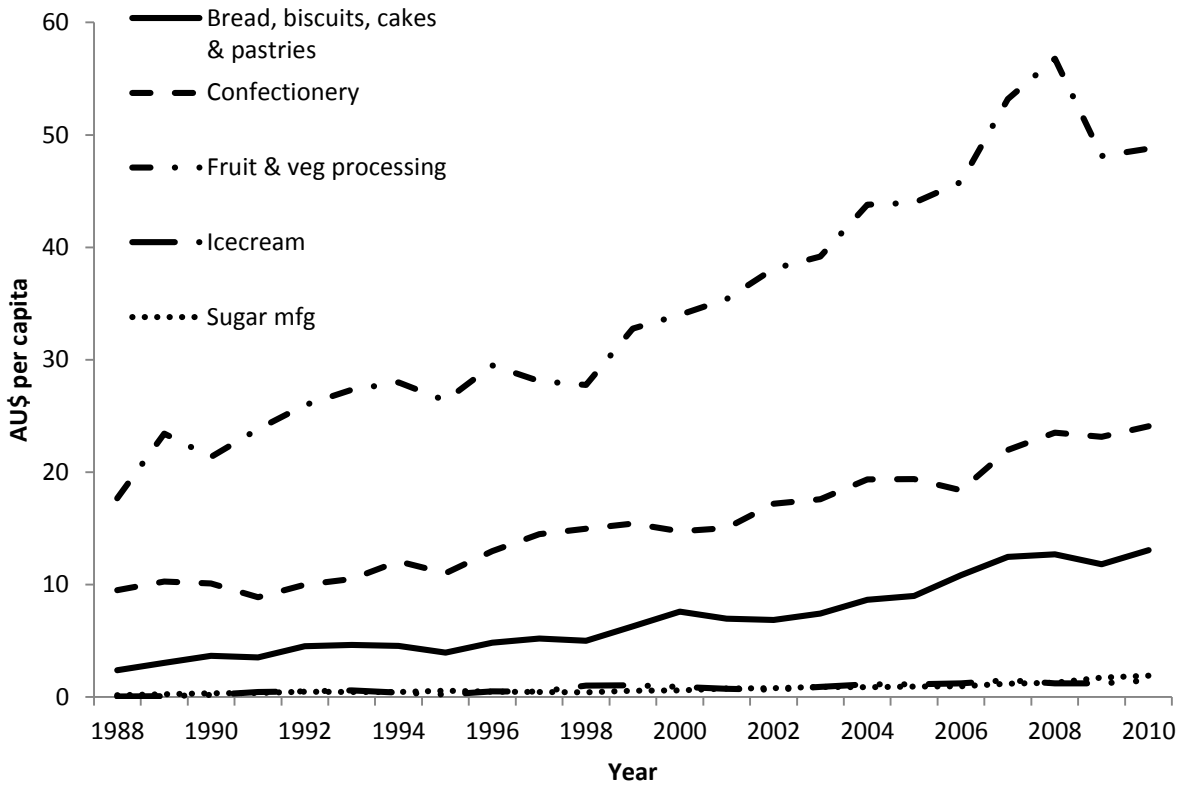

Note: values have been deflated to represent constant 1988 prices. Classification change in 2006

Supplement: MOESM3 [file 9495740]
